# Supplementary material
Source: PubMed Central journal article supplement (PMC6417484)
Supplement: mcy192_suppl_table_s1.pdf [file mcy192_suppl_table_s1.pdf]

**Table S1.** Normality analysis for the distributions observed for satDNA parameters in the four populations, by means of the Shapiro-Wilk's W test.

| Item       | N  | W        | p        |
|------------|----|----------|----------|
| AT         | 11 | 0.954675 | 0.703998 |
| length     | 11 | 0.937805 | 0.495051 |
| OJENs_abun | 11 | 0.870663 | 0.079058 |
| VALDs_abun | 11 | 0.882949 | 0.113395 |
| VALDg_abun | 11 | 0.968391 | 0.869842 |
| ALMOg_abun | 11 | 0.869600 | 0.076609 |
| OJENs_div  | 11 | 0.988877 | 0.996086 |
| VALDs_div  | 11 | 0.975867 | 0.938852 |
| VALDg_div  | 11 | 0.983485 | 0.982420 |
| ALMOg_div  | 11 | 0.988694 | 0.995819 |
