# Supplementary material
Source: PubMed Central journal article supplement (PMC6417484)
Supplement: mcy192_suppl_table_s3.pdf [file mcy192_suppl_table_s3.pdf]

**Table S3.** Correlation analysis between abundance (abun) and divergence (div) of satDNA families in the four libraries analyzed and their A+T content and repeat unit length. Pb= Bonferroni corrected P-value.

| Item 1     | Item 2 | N  | r     | t     | P     | Pb    |
|------------|--------|----|-------|-------|-------|-------|
| OJENs_abun | A+T    | 11 | -0.18 | -0.55 | 0.599 | 0.786 |
|            | length | 11 | 0.23  | 0.70  | 0.505 |       |
| VALDs_abun | A+T    | 11 | 0.14  | 0.42  | 0.681 |       |
|            | length | 11 | 0.60  | 2.27  | 0.049 |       |
| VALDg_abun | A+T    | 11 | 0.02  | 0.06  | 0.954 |       |
|            | length | 11 | 0.50  | 1.72  | 0.120 |       |
| ALMOg_abun | A+T    | 11 | 0.09  | 0.28  | 0.784 |       |
|            | length | 11 | 0.57  | 2.07  | 0.068 |       |
| OJENs_div  | A+T    | 11 | -0.09 | -0.26 | 0.798 |       |
|            | length | 11 | -0.15 | -0.47 | 0.649 |       |
| VALDs_div  | A+T    | 11 | -0.23 | -0.72 | 0.489 |       |
|            | length | 11 | -0.24 | -0.73 | 0.481 |       |
| VALDg_div  | A+T    | 11 | -0.09 | -0.26 | 0.797 |       |
|            | length | 11 | -0.13 | -0.40 | 0.695 |       |
| ALMOg_div  | A+T    | 11 | -0.23 | -0.70 | 0.503 |       |
|            | length | 11 | -0.26 | -0.81 | 0.440 |       |
