# Supplementary material
Source: PubMed Central journal article supplement (PMC6417484)
Supplement: mcy192_suppl_table_s4.pdf [file mcy192_suppl_table_s4.pdf]

**Table S4.** Number of monomers analyzed and mean variability for each satDNA family in three different populations of *V. speciosa*.

| Satellite name | Number of monomers |            |            | Variability |       |       |
|----------------|--------------------|------------|------------|-------------|-------|-------|
|                | OJENs              | VALDs      | ALMOg      | OJENs       | VALDs | ALMOg |
| VspSat01-59    | 75                 | 49         | 54         | 0.158       | 0.194 | 0.146 |
| VspSat02-101   | 48                 | 55         | 46         | 0.143       | 0.174 | 0.133 |
| VspSat03-33    | 93                 | 43         | 95         | 0.237       | 0.225 | 0.289 |
| VspSat04-107   | 6                  | 5          | 7          | 0.089       | 0.298 | 0.102 |
| VspSat05-141   | 9                  | 10         | 12         | 0.088       | 0.098 | 0.101 |
| VspSat06-67    | 19                 | 20         | 16         | 0.170       | 0.139 | 0.073 |
| VspSat07-70    | 22                 | 33         | 29         | 0.141       | 0.189 | 0.166 |
| VspSat08-82    | 20                 | 28         | 19         | 0.188       | 0.308 | 0.246 |
| VspSat09-68    | 37                 | 13         | 34         | 0.103       | 0.140 | 0.120 |
| VspSat10-62    | 37                 | 18         | 42         | 0.192       | 0.111 | 0.241 |
| VspSat11-34    | 16                 | 16         | 19         | 0.211       | 0.201 | 0.274 |
|                | <b>382</b>         | <b>290</b> | <b>373</b> |             |       |       |
