# Supplementary material
Source: PubMed Central journal article supplement (PMC6417484)
Supplement: mcy192_suppl_table_s5.pdf [file mcy192_suppl_table_s5.pdf]

**Table S5.** Extremely conserved regions compared to the remaining nucleotides in each of three satDNA families.

| <b>Satellite</b> | <b>Region: Start-End</b>     | <b>Conservation</b> | <b>Homozygosity</b> | <b>P-value</b> |
|------------------|------------------------------|---------------------|---------------------|----------------|
| VspSat02-101     | 49-59: AHCTTAHCCCC           | 0,818               | 0,990               | 0,0000         |
| VspSat04-107     | 46-55: ACAAAMATAT            | 0,900               | 0,986               | 0,0001         |
| VspSat05-141     | 106-124: GATTGATCTAGCACCACTT | 1,000               | 1,000               | 0,0003         |
